# Supplementary material
Source: publisher figshare collection journal article supplement (https://gsapubs.figshare.com/ndownloader/files/30645732)
Supplement: Supplementary file 1 [file 30645732]

Persico, L.P. et al., 2021, Late Quaternary geochronologic record of soil formation and erosion: Effects of climate change on Mojave Desert hillslopes (Nevada, USA): *Geology*, <https://doi.org/10.1130/G49270.1>

## **Soil Characterization Methods**

### ***Field Mapping and Sample Collection***

The Nipton Hills consist of a series of basins composed of crystalline early Proterozoic bedrock (Miller and Wooden, 1993). The nearest weather recording station, 22 km to the east and 1080 m ASL (US COOP station, Searchlight, NV) receives 196 mm of mean annual precipitation (MAP) and the mean annual temperature (MAT) of 17.3°C. Estimated MAP at the study area (1400 m ASL) is ~ 250 mm (McAuliffe, 2016). Precipitation is distinctly bimodal, with a pronounced cool-season peak from November through March and a summer monsoonal peak in July through September. Precipitation data in Figure 1 is from the Prism Climate Group, Oregon State University (2004). A digital elevation model (DEM) and orthophoto were constructed using structure from motion (SFM) of high overlap unmanned aerial vehicle imagery (Colomina and Molina, 2014). An eight-unit surficial geologic map was created by field mapping. Field identification of geomorphic units was aided by observations of vegetation type, soil morphology, and the high-resolution DEM and orthophoto. Standard soil-geomorphic properties were described (Birkeland, 1999) for 21 locations in the study area. Three locations selected for detailed soil analyses: (1) a north-facing hillslope with a well-developed soil in thick colluvium, (2) a prominent, isolated remnant of a similar colluvial deposit and associated soil on the south-facing slope, and (3) a prominent, well-preserved terrace remnant along the axial drainage (Table S1). At these locations, 0.1-1.0 kg samples were collected from each soil horizon for OSL, XRF, and particle size analyses. Rock samples were also collected to characterize bedrock variability throughout the study area. Cover of the ground surface by canopies of perennial plant species was measured by point-intercept sampling at 10 hillslope locations. Detailed vegetation data and mapping are included in a separate paper.

**Table S1. Soil profile descriptions and locations**

| Horizon                                                                                       | Depth (cm) | MC (dry)     | Struc <sup>a</sup> | Dry C <sup>b</sup> | Wet C <sup>c</sup> | Texture      | Texture <sub>d</sub> | Gravel% <sup>e</sup> | HCl <sup>f</sup>                           | CaCO <sub>3</sub> Stage <sup>g</sup> |
|-----------------------------------------------------------------------------------------------|------------|--------------|--------------------|--------------------|--------------------|--------------|----------------------|----------------------|--------------------------------------------|--------------------------------------|
| <b>Soil Profile ON - N aspect, thick colluvial mantle (35.45716° N, 115.17670° W)</b>         |            |              |                    |                    |                    |              |                      |                      |                                            |                                      |
| A1                                                                                            | 0-1        | 10YR 3/3     | 1, f, pl           | so                 | ns, sp             | 44 – 48 – 8  | L                    | 5-10                 | ne                                         | 0                                    |
| A2                                                                                            | 1-4        | 10YR 7/4     | lo                 | so                 | ns, sp             | 34 – 55 – 11 | SiL                  | < 5                  | ne                                         | 0                                    |
| B                                                                                             | 4-21       | 10YR 6/4     | f-c, gr            | so                 | s, p               | 27 – 57 – 16 | SiL                  | 30                   | ne                                         | 0                                    |
| Btk1                                                                                          | 21-71      | 7.5-10YR 6/6 | 2, m, sbk          | sh                 | s, p               | 26 – 56 – 18 | SiL                  | 60-75                | (matrix)<br>se<br>(upper)<br>ve<br>(lower) | I                                    |
| Btk2                                                                                          | 71-121+    | 7.5YR 6/6    | m                  | h                  | s, p               | 23 - 59 – 18 | SiL                  | -                    | se                                         | I                                    |
| <b>Soil Profile OS - S aspect, thick colluvial mantle remnant (35.45932° N, 115.17541° W)</b> |            |              |                    |                    |                    |              |                      |                      |                                            |                                      |
| V                                                                                             | 0-1        | 10YR 5/4     | 1, f, pl           | so                 | ns, np             | 57 – 35 – 8  | SL                   | -                    | ne                                         | 0                                    |
| A                                                                                             | 1-10       | 10YR 5/4     | 1, f, gr-nc        | so                 | ss, sp             | 30 – 52 – 18 | SiL                  | >75                  | ne                                         | 0                                    |
| AB                                                                                            | 10-25      | 10YR 6/6     | lo                 | so                 | s, p               | 36 – 49 – 15 | L                    | >75                  | e                                          | I                                    |
| Bk                                                                                            | 25-45      | 7.5YR 6/6    | 1, m, sbk          | sh                 | ss, sp             | 33 – 52 - 15 | SiL                  | <5                   | se                                         | I                                    |
| Btk                                                                                           | 45-70      | 7.5YR 5/6    | 2, m, sbk          | sh                 | ss, sp             | 32 – 53 – 15 | SiL                  | <5                   | e                                          | I                                    |
| B'k                                                                                           | 70-85      | 10YR 5/6     | m                  | sh                 | ss, sp             | 34 – 52 – 14 | SiL                  | 75                   | e                                          | 0                                    |
| B'k2                                                                                          | 85-125+    | 10YR 6/6     | lo                 | so                 | ss, sp             | 40 – 48 – 12 | L                    | 75                   | e                                          | 0                                    |
| <b>Soil Profile OT - Holocene alluvial terrace (35.5546° N, 115.18237° W)</b>                 |            |              |                    |                    |                    |              |                      |                      |                                            |                                      |
| A                                                                                             | 0-0.5      | 10YR 6/4     | lo                 |                    | ns, np             |              | LS                   | -                    | ne                                         |                                      |
| AB                                                                                            | 0.5-5      | 10YR 6/4     | f-c, gr            |                    | ns, np             | 64-31-5      | SL                   | 25                   | ne                                         |                                      |
| Bk1                                                                                           | 5-20       | 10YR 6/4     | 1, f- m, gr        | so                 | ss, np             | 65-30-5      | SL                   | >35                  | ne                                         |                                      |
| Bk2                                                                                           | 20-38      | 10YR 6/4     | f, gr              | so                 | ss, np             | 64-30-5      | SL                   |                      | (matrix)<br>e                              | I                                    |
| Bk3                                                                                           | 38-70+     | 10YR 6/3     | lo                 |                    | ns, np             | 80-19-1      | S                    |                      | (matrix)<br>e<br>(matrix)                  |                                      |

<sup>a</sup>Structure – 1: weak; 2: moderate; f: fine; m: medium; c: coarse; sbk: subangular blocky; pl: platy; gr: granular; ve: vesicular; ma: massive, lo: loose & non-coherent.

<sup>b</sup>Dry Consistence – so: soft; sh: slightly hard; h: hard.

<sup>c</sup>Wet Consistence – ns: non-sticky; ss: slightly sticky; s: sticky; np: non-plastic, sp: slightly plastic; p: plastic.

<sup>d</sup>Textural class – S: sand; LS: loamy sand; SL: sandy loam; L: loam; SCL: sandy clay loam; CL: clay loam; SiL: silt loam; SiCL: silty clay loam

<sup>e</sup>Rock + gravel (visual estimate).

<sup>f</sup>HCl reaction (effervescence) – ne: non-effervescent; e: slightly effervescent; se: strongly effervescent; ve: violently effervescent.

<sup>g</sup>Carbonate accumulation stage (Gile et al., 1966) – 0 = absent; I–IV = Stages I–IV.

<sup>h</sup>Horizon lower boundary – a: abrupt; c: clear; g: gradual; s: smooth, w: wavy.

### ***OSL Sample Collection***

Eight samples for OSL dating were collected from three sites in the Nipton Hills. OSL samples were collected from the soil profiles in colluvium on south aspect (LP-01, LP-02, LP-03) and north aspect (LP-04, LP-05, LP-06) hillslopes and alluvium from a 1.5m axial stream terrace (LP-07, LP-08). Methods for sample collection, processing and age determination are outlined below. OSL provides an age estimate of the time since sediment was last exposed to light (Huntley et al., 1985). Therefore, special considerations were followed to ensure that the sediment intervals targeted for OSL dating were not exposed to light during sample collection. Prior to sampling, vertical profiles were dug into the terrace alluvium and representative sites in the south- and north-facing hillslope colluvium. These profiles were cleaned off and described for sediment and soil structures prior to identifying the target intervals for OSL sampling. Due to the finer-grained nature of the sandy-gravel of the terrace alluvium, we were able to use traditional sampling methods (e.g. Nelson et al., 2015) and pound metal pipes horizontally into the sediment (LP-07 USU-2644, LP-08 USU-2645). The colluvial deposits on the hillslopes however were too coarse to allow us to drive a tube into the finer matrix between the clasts. For these sites we collected the samples at night using red-light headlamps (Kenworthy et al., 2014; Nelson et al., 2015). During night-time sampling, the exposures were cleared back to remove light-exposed sediments and then the fine fraction was extracted from between larger clasts and stored in light-safe container for transport. For both sampling methods, we collected representative rocks and sediment from around each target interval for dose rate determination and measurement of water content.

### ***Sample Processing***

OSL samples were processed and analyzed at the Utah State University Luminescence Laboratory in Logan, Utah. Samples were opened under dim amber light ( $\sim 590$  nm) and sieved to two grainsize fractions (63-150  $\mu\text{m}$  and 250-355  $\mu\text{m}$ ) to help identify different sourced sediment. The alluvial terrace sample was sieved to 90-150  $\mu\text{m}$ . Quartz sediment in each grain-size fraction was isolated by using 10% hydrochloric acid (HCl) and 5% sodium hypochlorite (bleach) to dissolve carbonates and organic material and sodium polytungstate (2.7 g/cm<sup>3</sup>) to remove heavy minerals. Feldspar and other non-quartz minerals were removed using three 30-minute etchings in concentrated hydrofluoric acid (47% HF) followed by hydrochloric acid (45%

HCl) to prevent formation of fluorite precipitates (See Rittenour et al., 2005 for details). Purity of the samples was checked using infrared (IR) stimulation; all aliquots with an IR response signal to background ratio of  $> 2.0$  were rejected and not used for age calculation.

### ***Dose Rate Determination***

Key to calculating the OSL age of a sample is determination of the rate of radiation exposure the sample received during burial. The concentrations of the K, Rb, Th, and U radioisotopes were analyzed using ICP-MS and ICP-AES techniques on representative sediment and rock subsamples collected from the OSL target intervals (Table S2). These concentrations were converted to dose rate using conversion factors (Guérin et al., 2011) and corrected for attenuation due to the specific grain-size fractions analyzed (Brennan, 2003) and water content (Aitken, 1998). The beta dose rate was calculated from the radio-elemental concentrations of the fine sediment fraction only, while the gamma dose rate was calculated as a function of the percent of fine sediment and rock/cobble/pebble content (see Table S3). Total dose-rate values include cosmic contribution by using sample depth, elevation, and longitude/latitude following Prescott and Hutton (1994). Dose-rate uncertainties were calculated in quadrature using the methods of Aitken and Alldred (1972) and Aitken (1976, 1985) and include uncertainty in the elemental concentrations related to ICP detection limits (following Rittenour et al., 2005), moisture content variability ( $5 \pm 2\%$  weight percent water content used), 3% uncertainty for dose-rate conversion (Murray and Olley, 2002) and 10% uncertainty in cosmic dose.

**Table S2. Dose Rate Information**

| Sample num. | USU num. | Depth (m) | Fraction <sup>1</sup> | K (%) <sup>2</sup> | Rb (ppm) <sup>2</sup> | Th (ppm) <sup>2</sup> | U (ppm) <sup>2</sup> | Cosmic (Gy/kyr) |
|-------------|----------|-----------|-----------------------|--------------------|-----------------------|-----------------------|----------------------|-----------------|
| LP-01       | USU-2230 | 0.18-0.28 | Fines (45%)           | 2.76±0.07          | 87.5±3.5              | 10.4±0.9              | 2.4±0.2              | 0.26±0.03       |
|             |          |           | Rocks (55%)           | 4.91±0.12          | 224.0±9.0             | 37.4±3.4              | 1.9±0.1              |                 |
| LP-02       | USU-2231 | 0.6-0.7   | Fines (60%)           | 3.41±0.09          | 178.0±7.1             | 24.3±2.2              | 3.1±0.2              | 0.25±0.02       |
|             |          |           | Rocks (40%)           | 3.48±0.09          | 158.5±6.3             | 31.3±2.8              | 2.1±0.2              |                 |
| LP-03       | USU-2232 | 0.95-1.00 | Fines (55%)           | 2.89±0.07          | 147.0±5.9             | 23.7±2.1              | 2.6±0.2              | 0.24±0.02       |
|             |          |           | Rocks (45%)           | 4.16±0.10          | 179.0±7.2             | 39.8±3.6              | 3.0±0.2              |                 |
| LP-04       | USU-2233 | 0.2-0.3   | Fines (35%)           | 3.30±0.08          | 174.5±7.0             | 23.8±2.1              | 2.4±0.2              | 0.26±0.03       |
|             |          |           | Rocks (65%)           | 4.80±0.12          | 234.0±9.4             | 32.3±2.9              | 1.6±0.1              |                 |
| LP-05       | USU-2234 | 0.7-0.8   | Fines (35%)           | 3.32±0.08          | 172.0±6.9             | 26.2±2.4              | 2.5±0.2              | 0.24±0.02       |
|             |          |           | Rocks (65%)           | 4.32±0.11          | 223.0±8.9             | 24.7±2.2              | 1.7±0.1              |                 |
| LP-06       | USU-2235 | 0.15-0.23 | Fines (80%)           | 1.81±0.05          | 98.9±4.0              | 11.5±1.0              | 2.6±0.2              | 0.26±0.03       |
|             |          |           | Rocks (20%)           | 1.63±0.04          | 136.0±5.4             | 8.3±0.7               | 1.8±0.1              |                 |
| LP-07       | USU-2644 | 0.30-0.34 | Sand (50%)            | 3.46±0.09          | 157.5±6.3             | 27.8±2.5              | 2.5±0.2              | 0.26±0.03       |
|             |          |           | Pebble (50%)          | 4.25±0.11          | 175.0±7.0             | 19.2±1.7              | 1.9±0.1              |                 |
| LP-08       | USU-2645 | 0.14-0.17 | Sand (40%)            | 3.57±0.09          | 144.5±5.8             | 29.6±2.7              | 2.5±0.2              | 0.26±0.03       |
|             |          |           | Pebble (40%)          | 4.20±0.11          | 179.0±7.2             | 27.4±2.5              | 2.4±0.2              |                 |
|             |          |           | Cobble (20%)          | 3.39±0.08          | 177.5±7.1             | 42.3±3.8              | 4.6±0.3              |                 |

<sup>1</sup> Weight % (in parentheses) proportions of the fines/sand and rocks/pebble/cobbles in each representative dose-rate sample collected from the sediments surrounding each OSL sample.

<sup>2</sup> Radio-elemental concentrations of the sediment surrounding each OSL sample, determined using ICP-MS and ICP-AES techniques.

### ***Optical Measurements***

OSL samples were analyzed following the single-aliquot regenerative dose (SAR) technique of Murray and Wintle (Murray and Wintle, 2000) of quartz sand (1-2 mm diameter for 63-150µm and 5 mm diameter for 250-355 µm fraction). Optical measurements were performed on Risø TL/OSL Model DA-20 readers, with stimulation by blue-green light emitting diodes (LED, 470±30 nm) and the luminescence signal was detected through 7.5-mm UV filters (U-340) over 40-50 seconds (250 channels) at 125°C with LED diodes at 40 mW/cm<sup>2</sup> power. Luminescence signals were calculated by subtracting the average of the last 5 seconds (background signal) from the sum of first 0.7 seconds (4 channels) of signal. The luminescence signals show rapid decay dominated by the fast component of the signal, essential for accurate quartz OSL results (Wintle and Murray, 2006). Average ‘Fast ratios’ (Durcan and Duller, 2011) and luminescence sensitivity (photon counts produced per dose of applied radiation) for the very

fine sand fraction were notably higher than those from the fine to medium sand fraction (Figure S1 and S2).

**Table S3. Dose Rate contributions**

| Sample num. | USU num. | Grain size (μm) | Beta <sup>1</sup> (Gy/kyr) | Gamma <sup>2</sup> (Gy/kyr) | Cosmic <sup>3</sup> (Gy/kyr) | Total DR <sup>4</sup> (Gy/kyr) |
|-------------|----------|-----------------|----------------------------|-----------------------------|------------------------------|--------------------------------|
| LP-01       | USU-2230 | 63-150          | 2.53±0.10                  | 2.30±0.09                   | 0.26±0.03                    | 5.10±0.21                      |
|             |          | 250-355         | 2.30±0.09                  |                             |                              | 4.86±0.20                      |
| LP-02       | USU-2231 | 63-150          | 3.42±0.16                  | 2.32±0.11                   | 0.25±0.02                    | 5.99±0.28                      |
|             |          | 250-355         | 3.08±0.15                  |                             |                              | 5.66±0.27                      |
| LP-03       | USU-2232 | 63-150          | 2.96±0.15                  | 2.51±0.12                   | 0.24±0.02                    | 5.71±0.28                      |
|             |          | 250-355         | 2.67±0.13                  |                             |                              | 5.42±0.27                      |
| LP-04       | USU-2233 | 63-150          | 3.24±0.15                  | 2.53±0.12                   | 0.26±0.03                    | 6.04±0.28                      |
|             |          | 250-355         | 2.93±0.14                  |                             |                              | 5.72±0.27                      |
| LP-05       | USU-2234 | 63-150          | 3.32±0.16                  | 2.29±0.11                   | 0.24±0.02                    | 5.85±0.27                      |
|             |          | 250-355         | 3.00±0.14                  |                             |                              | 5.53±0.26                      |
| LP-06       | USU-2235 | 63-150          | 1.90±0.09                  | 1.17±0.05                   | 0.26±0.03                    | 3.33±0.16                      |
|             |          | 250-355         | 1.71±0.07                  |                             |                              | 3.15±0.13                      |
| LP-07       | USU-2644 | 90-150          | 3.42±0.14                  | 2.21±0.09                   | 0.26±0.03                    | 5.89±0.23                      |
| LP-08       | USU-2645 | 90-150          | 3.54±0.17                  | 2.61±0.13                   | 0.26±0.03                    | 6.42±0.31                      |

<sup>1</sup> Beta dose rate based on the radio-elemental concentrations of the sand/fines from the representative sample of the sediment surrounding the OSL sample (see Table S1). This dose rate includes attenuation from 5±2% weight percent water content (following Aitken, 1985 for beta dose), is scaled by grain size following Brennan (2003) and is based on conversion factors of Guérin et al. (2011).

<sup>2</sup> Gamma dose rate based on the radio-elemental concentrations of both the sand/fines and the rock/pebbles/cobbles in their weight-percent proportions (see Table S1). This dose rate includes attenuation from 5±2% weight percent water content (following Aitken and Xie 1990 and Aitken 1985 for gamma dose) and is based on conversion factors of Guérin et al. (2011).

<sup>3</sup> Contribution of cosmic radiation to the dose rate was calculated by using sample depth, elevation, and longitude/latitude following Prescott and Hutton (1994).

<sup>4</sup> Total dose rate is derived from summed contributions from the beta, gamma and cosmic dose rates for the grain-size fraction of each sample.

### ***Equivalent Dose (De) and Error Calculation***

We analyzed 20 to 42 aliquots (subsamples, approximately 50-100 sand grains) per sample to calculate the equivalent dose (De) of radiation the sample received during burial to determine the OSL ages. De values were calculated using interpolation onto dose-response plots fit with saturating-exponential and saturating-exponential plus linear fits to the given regenerative dose points. Data from aliquots were rejected and not used in age calculation if they had evidence of feldspar contamination, corrected signals from repeated doses >20% of unity, recuperation of the zero-dose point >10% of the natural signal, or De greater than the highest regenerative dose given. OSL ages (Table S4) were calculated using the central age

model (CAM) of Galbraith and Roberts (2012) on all samples except the 63-150  $\mu\text{m}$  fraction of LP-06 (USU-2235), which was calculated using a Minimum Age Model (MAM, Galbraith and Roberts, 2012) due to large inter-aliquot scatter (See Figure S2). Errors on  $D_e$  and age estimates are reported at 2-sigma standard error and include errors related to instrument calibration, and dose rate and equivalent dose calculations and were calculated in quadrature using the methods of Aitken and Alldred (1972).

**Table S4. Optically Stimulated Luminescence (OSL) Age Information**

| Sample num. | USU num. | Grain size ( $\mu\text{m}$ ) | Num. of aliquots <sup>1</sup> | Dose rate (Gy/ka) | Equivalent Dose $\pm 2\sigma$ (Gy) | OSL age $\pm 2\sigma$ (ka)         | Age Model <sup>2</sup> |
|-------------|----------|------------------------------|-------------------------------|-------------------|------------------------------------|------------------------------------|------------------------|
| LP-01       | USU-2230 | 63-150                       | 14 (29)                       | $5.10 \pm 0.21$   | $67.90 \pm 9.14$                   | <b><math>13.33 \pm 2.09</math></b> | <b>CAM</b>             |
| LP-01       | USU-2230 | 250-355                      | 15 (31)                       | $4.86 \pm 0.20$   | $88.11 \pm 18.98$                  | <b><math>18.12 \pm 4.17</math></b> | <b>CAM</b>             |
| LP-02       | USU-2231 | 63-150                       | 14 (32)                       | $5.99 \pm 0.28$   | $110.57 \pm 19.24$                 | <b><math>18.46 \pm 3.68</math></b> | <b>CAM</b>             |
| LP-02       | USU-2231 | 250-355                      | 16 (42)                       | $5.66 \pm 0.27$   | $168.88 \pm 20.21$                 | <b><math>29.85 \pm 4.60</math></b> | <b>CAM</b>             |
| LP-03       | USU-2232 | 63-150                       | 19 (28)                       | $5.71 \pm 0.28$   | $107.61 \pm 17.25$                 | <b><math>18.84 \pm 3.54</math></b> | <b>CAM</b>             |
| LP-03       | USU-2232 | 250-355                      | 13 (25)                       | $5.42 \pm 0.27$   | $125.47 \pm 32.64$                 | <b><math>23.15 \pm 6.43</math></b> | <b>CAM</b>             |
| LP-04       | USU-2233 | 63-150                       | 15 (24)                       | $6.04 \pm 0.28$   | $63.45 \pm 6.26$                   | <b><math>10.51 \pm 1.45</math></b> | <b>CAM</b>             |
| LP-04       | USU-2233 | 250-355                      | 14 (20)                       | $5.72 \pm 0.27$   | $47.32 \pm 5.42$                   | <b><math>8.27 \pm 1.24</math></b>  | <b>CAM</b>             |
| LP-05       | USU-2234 | 63-150                       | 12 (32)                       | $5.85 \pm 0.27$   | $87.23 \pm 9.25$                   | <b><math>14.91 \pm 2.14</math></b> | <b>CAM</b>             |
| LP-05       | USU-2234 | 250-355                      | 11 (14)                       | $5.53 \pm 0.26$   | $88.83 \pm 19.81$                  | <b><math>16.07 \pm 3.91</math></b> | <b>CAM</b>             |
| LP-06       | USU-2235 | 63-150                       | 12 (41)                       | $3.33 \pm 0.16$   | $9.54 \pm 2.89$                    | <b><math>2.86 \pm 0.91</math></b>  | <b>MAM</b>             |
| LP-06       | USU-2235 | 250-355                      | 11 (31)                       | $3.15 \pm 0.13$   | $7.48 \pm 1.83$                    | <b><math>2.38 \pm 0.61</math></b>  | <b>CAM</b>             |
| LP-07       | USU-2644 | 90-150                       | 12 (24)                       | $5.89 \pm 0.23$   | $20.64 \pm 1.28$                   | <b><math>3.51 \pm 0.36</math></b>  | <b>CAM</b>             |
| LP-08       | USU-2645 | 90-150                       | 19 (24)                       | $6.42 \pm 0.31$   | $20.77 \pm 3.66$                   | <b><math>3.24 \pm 0.65</math></b>  | <b>CAM</b>             |

<sup>1</sup> Age analysis using the single-aliquot regenerative-dose procedure of Murray and Wintle (2000) on 1-2 mm (63-150 $\mu\text{m}$  fraction), or 5-mm (250-355 $\mu\text{m}$  fraction) aliquots of quartz sand. Number of aliquots used in age calculation and number of aliquots analyzed in parentheses.

<sup>2</sup> Equivalent dose ( $D_e$ ) calculated using the Central Age Model (CAM) or the Minimum Age Model (MAM) of Galbraith and Roberts (2012).

# South-facing hillslope colluvium

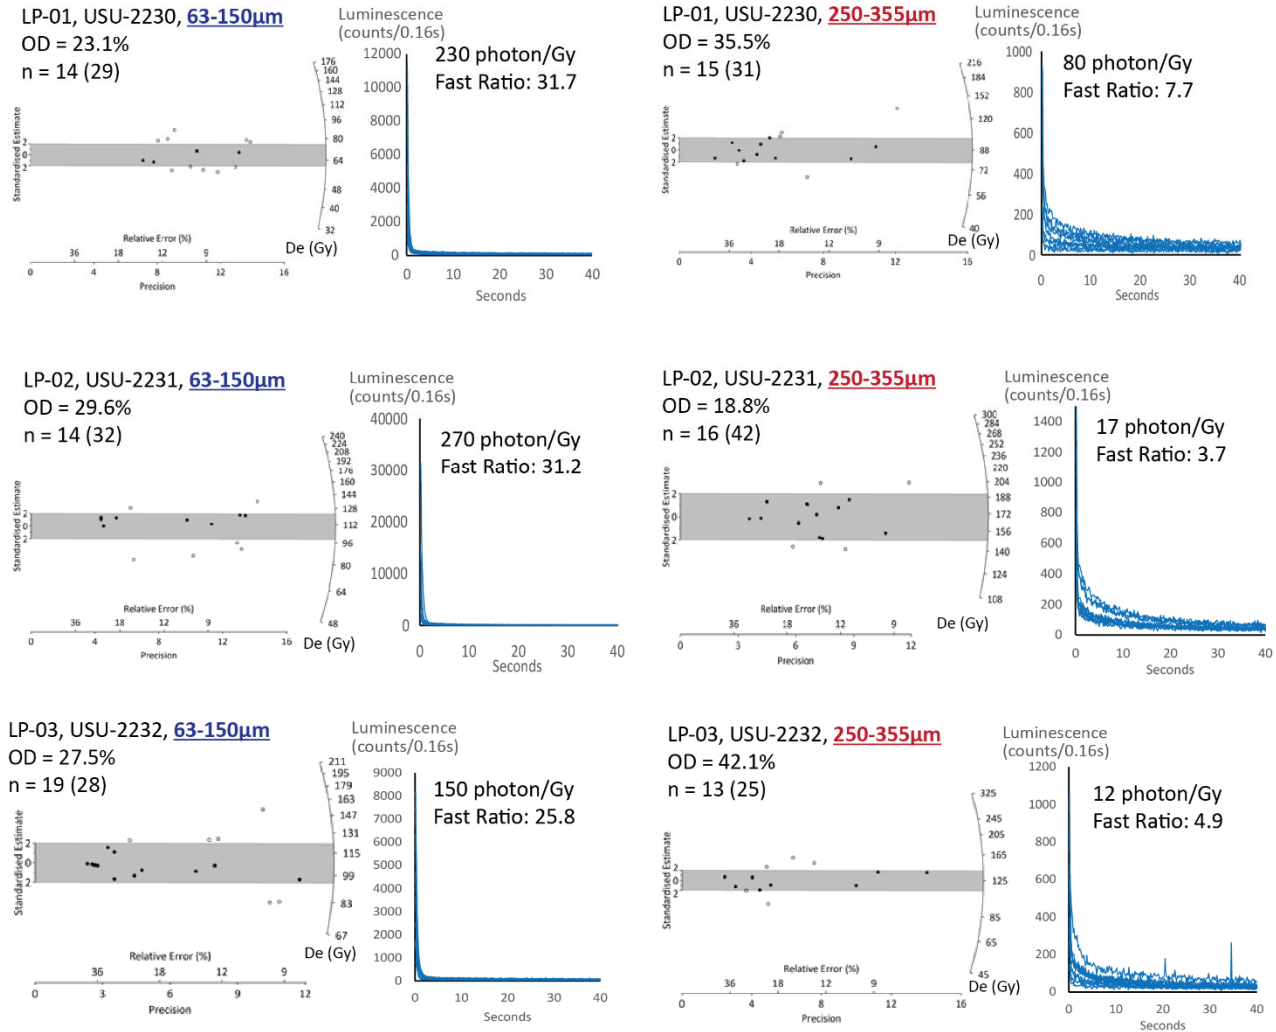

**Figure S1.** Equivalent dose distributions and the natural luminescence signal decay curves for sample from south-facing hillslope colluvium, plotted in stratigraphic order. The very fine sand fraction is plotted on the left and the fine to medium sand fraction are plotted on the right. Note that the very fine sand fractions have much brighter luminescence signals with greater luminescence sensitivity (number of photon/Gy dose) and higher Fast ratios (Durcan and Duller, 2011), both indicating the grains were likely more distally sourced.



### North-facing hillslope colluvium

LP-04, USU-2233, **63-150 $\mu$ m**

OD = 15.5%

n = 15 (24)

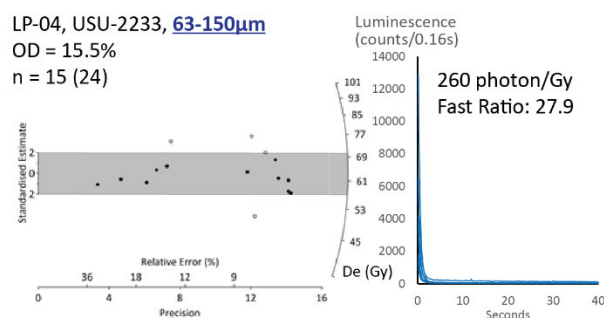

LP-04, USU-2233, **250-355 $\mu$ m**

OD = 14.7%

n = 14 (20)

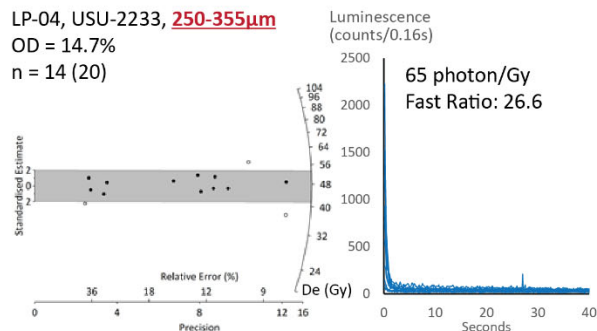

LP-05, USU-2234, **63-150 $\mu$ m**

OD = 10.4%

n = 12 (32)

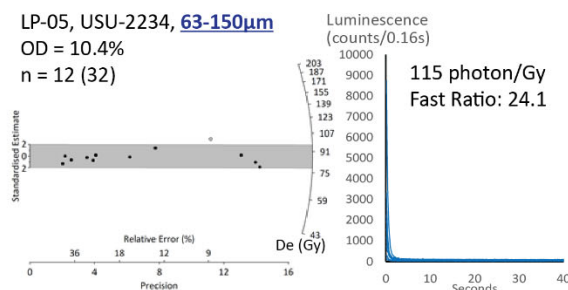

LP-05, USU-2234, **250-355 $\mu$ m**

OD = 33.2%

n = 11 (14)

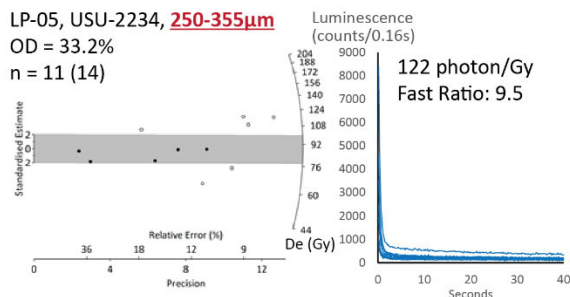

LP-06, USU-2235, **63-150 $\mu$ m**

OD = 99.7%

n = 12 (41)

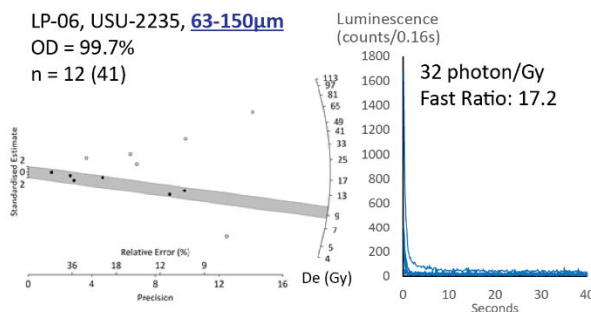

LP-06, USU-2235, **250-355 $\mu$ m**

OD = 27.8%

n = 11 (31)

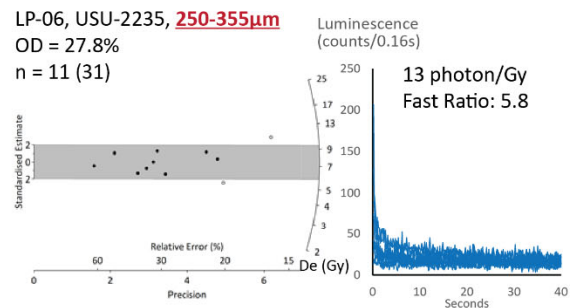

### Axial stream terrace alluvium

LP-07, USU-2644, **90-150 $\mu$ m**

OD = 3.6%

n = 12 (24)

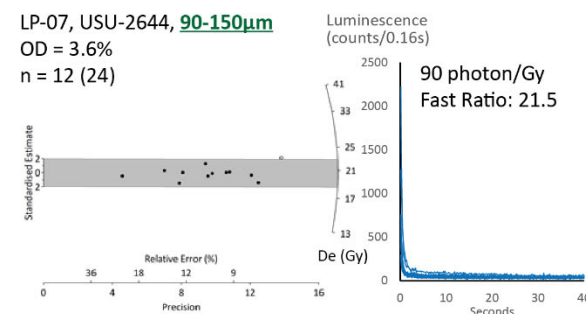

LP-08, USU-2645, **90-150 $\mu$ m**

OD = 35.8%

n = 19 (24)

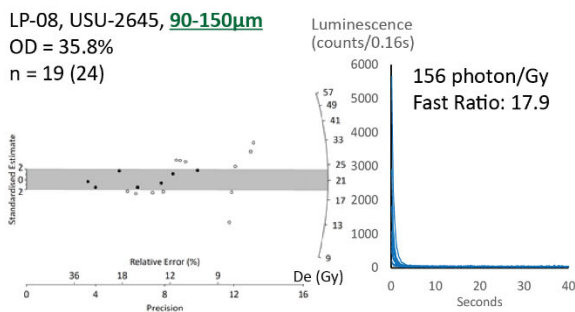

**Figure S2.** Similar to Figure S1 but with samples from north-facing hillslope colluvium and axial stream terrace alluvium. As with Figure S1, the samples are plotted in stratigraphic order and the coarser sediment are on the right (note that the two stream terrace alluvium samples have the same grain-size).

### ***Laser Diffraction Sample Preparation and Analysis***

Particle size of the fine fraction of the soil horizons was determined using laser diffraction (Al-Hashemi et al., 2021; Faé et al., 2019). Roots were removed from samples and then the samples were dried at 105° in an oven. Samples were homogenized and sieved to collect the < 2mm size fraction. Samples were treated with H<sub>2</sub>O<sub>2</sub> at 70° C for several hours to remove organic material. Grain size distributions were determined using a Malvern Mastersizer 3000 with a Hydro LV wet dispersion unit. Before and during measurements, samples were ultrasonicated to keep particles disaggregated. To increase accuracy, two different subsamples were analyzed for each soil horizon and the results were averaged.

### ***XRF Sample Preparation and Analysis***

XRF samples were analyzed from B-horizons of the hillslope soils. On the north-aspect hillslope, two Btk horizons and one Bk were selected and on the south hillslope the Bk and Btk horizons were sampled (Table S5). Samples were separated into four grain size fractions: 25-125 µm, 125-355 µm, 355-850 µm, and 850-2000 µm by wet sieving the bulk sample. Grains smaller than 25 µm were lost during the wet sieving process. Each grain size fraction was dried in an oven at 105° for one hour. Samples were powdered via a rod and ball mill pulverizer to minimize x-ray fluorescence analysis error. Between 15-25 grams of each sample was pulverized for 5 minutes. Differences in the amount of sample pulverized for analysis resulted from limited quantities of certain grain size fractions. The 25-125 µm and 355-850 µm size size fractions were selected for analysis. For soil horizon Bw at O-S and horizons Bw and Btk2 O-N, the 355-850 µm and 850-2000 µm size fractions were combined due to lack of material to provide accurate results. Samples were analyzed on a Rigaku ZSX Primus II wavelength dispersive XRF spectrometer at the Analytical Geochemistry Laboratory at the University of New Mexico.

**Table S5. XRF-Chemistry Information**

| No.                               | Component | Result | Unit   | Det. Limit | El. Line | Intensity | w/o Normal |
|-----------------------------------|-----------|--------|--------|------------|----------|-----------|------------|
| <b>Sample: O-S Btk 25-125 µm</b>  |           |        |        |            |          |           |            |
| 1                                 | Na2O      | 1.18   | mass % | 0.01309    | Na-KA    | 4.3257    | 0.8819     |
| 2                                 | MgO       | 2.35   | mass % | 0.01077    | Mg-KA    | 21.1996   | 1.7569     |
| 3                                 | Al2O3     | 18.8   | mass % | 0.01403    | Al-KA    | 409.7206  | 14.0187    |
| 4                                 | SiO2      | 57.6   | mass % | 0.02122    | Si-KA    | 964.2552  | 43.0149    |
| 5                                 | P2O5      | 0.447  | mass % | 0.00318    | P-KA     | 12.4370   | 0.3337     |
| 6                                 | SO3       | 0.0425 | mass % | 0.00294    | S-KA     | 0.9959    | 0.0317     |
| 7                                 | Cl        | 0.0131 | mass % | 0.00382    | Cl-KA    | 0.1955    | 0.0098     |
| 8                                 | K2O       | 4.06   | mass % | 0.00447    | K-KA     | 235.5496  | 3.0293     |
| 9                                 | CaO       | 5.39   | mass % | 0.00451    | Ca-KA    | 212.3651  | 4.0252     |
| 10                                | TiO2      | 1.22   | mass % | 0.00875    | Ti-KA    | 10.9796   | 0.9081     |
| 11                                | MnO       | 0.176  | mass % | 0.0052     | Mn-KB1   | 7.1322    | 0.1316     |
| 12                                | Fe2O3     | 8.39   | mass % | 0.00627    | Fe-KA    | 470.9443  | 6.2619     |
| 13                                | NiO       | 0.0070 | mass % | 0.00297    | Ni-KA    | 0.6553    | 0.0053     |
| 14                                | CuO       | 0.0118 | mass % | 0.0026     | Cu-KA    | 1.4503    | 0.0088     |
| 15                                | ZnO       | 0.0259 | mass % | 0.00228    | Zn-KA    | 4.3312    | 0.0194     |
| 16                                | Rb2O      | 0.0224 | mass % | 0.00132    | Rb-KA    | 13.2018   | 0.0167     |
| 17                                | SrO       | 0.0619 | mass % | 0.00134    | Sr-KA    | 38.6713   | 0.0462     |
| 18                                | ZrO2      | 0.0874 | mass % | 0.00898    | Zr-KB1   | 12.7516   | 0.0653     |
| 19                                | Nb2O5     | 0.0053 | mass % | 0.00166    | Nb-KA    | 3.4366    | 0.0039     |
| 20                                | BaO       | 0.126  | mass % | 0.02887    | Ba-LA    | 0.5020    | 0.0940     |
| 21                                | PbO       | 0.0153 | mass % | 0.00400    | Pb-LA    | 2.0877    | 0.0114     |
| <b>Sample: O-S Btk 355-850 µm</b> |           |        |        |            |          |           |            |
| 1                                 | Na2O      | 1.35   | mass % | 0.01204    | Na-KA    | 5.1990    | 1.0592     |
| 2                                 | MgO       | 1.34   | mass % | 0.00942    | Mg-KA    | 12.7462   | 1.0521     |
| 3                                 | Al2O3     | 17     | mass % | 0.01283    | Al-KA    | 397.9782  | 13.3633    |
| 4                                 | SiO2      | 58.8   | mass % | 0.02045    | Si-KA    | 1070.452  | 46.3018    |
| 5                                 | P2O5      | 0.609  | mass % | 0.00327    | P-KA     | 18.0907   | 0.4796     |
| 6                                 | SO3       | 0.0137 | mass % | 0.00283    | S-KA     | 0.3435    | 0.0108     |
| 7                                 | Cl        | 0.0120 | mass % | 0.00362    | Cl-KA    | 0.1900    | 0.0094     |
| 8                                 | K2O       | 5.50   | mass % | 0.00496    | K-KA     | 336.6078  | 4.3297     |
| 9                                 | CaO       | 6.57   | mass % | 0.00471    | Ca-KA    | 263.3994  | 5.1779     |
| 10                                | TiO2      | 1.10   | mass % | 0.01373    | Ti-KA    | 9.9725    | 0.8698     |
| 11                                | MnO       | 0.206  | mass % | 0.00513    | Mn-KB1   | 8.4262    | 0.1623     |
| 12                                | Fe2O3     | 7.26   | mass % | 0.00588    | Fe-KA    | 413.3753  | 5.7157     |
| 13                                | NiO       | 0.0071 | mass % | 0.00280    | Ni-KA    | 0.06598   | 0.0056     |
| 14                                | ZnO       | 0.0182 | mass % | 0.00207    | Zn-KA    | 3.2018    | 0.0144     |

|    |      |        |        |         |        |         |        |
|----|------|--------|--------|---------|--------|---------|--------|
| 15 | Rb2O | 0.0292 | mass % | 0.00126 | Rb-KA  | 18.1204 | 0.0230 |
| 16 | SrO  | 0.0532 | mass % | 0.00128 | Sr-KA  | 35.0739 | 0.0419 |
| 17 | Y2O3 | 0.0195 | mass % | 0.00705 | Y-KB1  | 3.0062  | 0.0154 |
| 18 | ZrO2 | 0.0459 | mass % | 0.00821 | Zr-KB1 | 7.0648  | 0.0361 |
| 19 | BaO  | 0.0901 | mass % | 0.03207 | Ba-LA  | 0.3595  | 0.0710 |
| 20 | PbO  | 0.0152 | mass % | 0.00376 | Pb-LA  | 2.1855  | 0.0119 |

**Sample: O-S Bk 25-125 µm**

|    |       |        |        |          |        |          |         |
|----|-------|--------|--------|----------|--------|----------|---------|
| 1  | Na2O  | 1.44   | mass % | 5.4117   | Na-KA  | 5.4117   | 1.1005  |
| 2  | MgO   | 2.36   | mass % | 21.7179  | Mg-KA  | 21.7179  | 1.7993  |
| 3  | Al2O3 | 18.6   | mass % | 413.4449 | Al-KA  | 413.4449 | 14.1436 |
| 4  | SiO2  | 58.2   | mass % | 995.6221 | Si-KA  | 995.6221 | 44.3446 |
| 5  | P2O5  | 0.537  | mass % | 15.2254  | P-KA   | 15.2254  | 0.4096  |
| 6  | SO3   | 0.0459 | mass % | 1.0918   | S-KA   | 1.0918   | 0.0349  |
| 7  | Cl    | 0.0155 | mass % | 0.2343   | Cl-KA  | 0.2343   | 0.0118  |
| 8  | K2O   | 4.18   | mass % | 247.1712 | K-KA   | 247.1712 | 3.1877  |
| 9  | CaO   | 4.59   | mass % | 184.2085 | Ca-KA  | 184.2085 | 3.4983  |
| 10 | TiO2  | 1.27   | mass % | 11.8427  | Ti-KA  | 11.8427  | 0.9663  |
| 11 | Cr2O3 | 0.0147 | mass % | 0.3695   | Cr-KA  | 0.3695   | 0.0112  |
| 12 | MnO   | 0.137  | mass % | 6.1670   | Mn-KB1 | 6.167    | 0.1043  |
| 13 | Fe2O3 | 8.35   | mass % | 94.2582  | Fe-KB1 | 94.2582  | 6.3656  |
| 14 | NiO   | 0.0077 | mass % | 0.7433   | Ni-KA  | 0.7433   | 0.0059  |
| 15 | CuO   | 0.0056 | mass % | 0.8175   | Cu-KA  | 0.8175   | 0.0043  |
| 16 | ZnO   | 0.0266 | mass % | 4.6004   | Zn-KA  | 4.6004   | 0.0203  |
| 17 | Rb2O  | 0.0221 | mass % | 13.4871  | Rb-KA  | 13.4871  | 0.0168  |
| 18 | SrO   | 0.0648 | mass % | 41.9411  | Sr-KA  | 41.9411  | 0.0494  |
| 19 | ZrO2  | 0.0848 | mass % | 12.8064  | Zr-KB1 | 12.8064  | 0.0646  |
| 20 | Nb2O5 | 0.0045 | mass % | 3.0744   | Nb-KA  | 3.0744   | 0.0035  |
| 21 | BaO   | 0.0852 | mass % | 0.3518   | Ba-LA  | 0.3518   | 0.0650  |
| 22 | PbO   | 0.0101 | mass % | 1.4266   | Pb-LA  | 1.4266   | 0.0077  |

**Sample: O-S Bk 355-2000 µm**

|    |       |        |        |         |       |          |         |
|----|-------|--------|--------|---------|-------|----------|---------|
| 1  | Na2O  | 1.7    | mass % | 0.0114  | Na-KA | 6.6952   | 1.3544  |
| 2  | MgO   | 1.41   | mass % | 0.00953 | Mg-KA | 13.6736  | 1.1254  |
| 3  | Al2O3 | 17.2   | mass % | 0.01281 | Al-KA | 408.5441 | 13.7082 |
| 4  | SiO2  | 59.8   | mass % | 0.02047 | Si-KA | 1100.53  | 47.7082 |
| 5  | P2O5  | 0.645  | mass % | 0.00318 | P-KA  | 19.2432  | 0.5145  |
| 6  | SO3   | 0.0223 | mass % | 0.00278 | S-KA  | 0.5596   | 0.0178  |
| 7  | Cl    | 0.0120 | mass % | 0.00349 | Cl-KA | 0.1909   | 0.0095  |
| 8  | K2O   | 5.66   | mass % | 0.00369 | K-KA  | 348.7727 | 4.5203  |
| 9  | CaO   | 4.90   | mass % | 0.00447 | Ca-KA | 198.1625 | 3.9099  |
| 10 | TiO2  | 1.16   | mass % | 0.00903 | Ti-KA | 10.8631  | 0.9224  |

|    |       |        |        |         |        |          |        |
|----|-------|--------|--------|---------|--------|----------|--------|
| 11 | MnO   | 0.129  | mass % | 0.00492 | Mn-KA  | 5.4869   | 0.103  |
| 12 | Fe2O3 | 7.05   | mass % | 0.00562 | Fe-KA  | 417.6449 | 5.6278 |
| 13 | ZnO   | 0.0151 | mass % | 0.00199 | Zn-KA  | 2.7637   | 0.012  |
| 14 | Rb2O  | 0.0266 | mass % | 0.00122 | Rb-KA  | 17.2887  | 0.0213 |
| 15 | SrO   | 0.0447 | mass % | 0.00125 | Sr-KA  | 30.7922  | 0.0357 |
| 16 | ZrO2  | 0.0497 | mass % | 0.00799 | Zr-KB1 | 8.0199   | 0.0397 |
| 17 | Nb2O5 | 0.0040 | mass % | 0.00149 | Nb-KA  | 2.8792   | 0.0032 |
| 18 | BaO   | 0.140  | mass % | 0.02679 | Ba-LA  | 0.5820   | 0.1119 |
| 19 | WO3   | 0.0209 | mass % | 0.00622 | W-LA   | 1.1556   | 0.0167 |
| 20 | PbO   | 0.0077 | mass % | 0.00363 | Pb-LA  | 1.1617   | 0.0062 |

**Sample: O-N Btk 1 25-125 µm**

|    |       |        |        |         |        |          |         |
|----|-------|--------|--------|---------|--------|----------|---------|
| 2  | MgO   | 2.02   | mass % | 0.01055 | Mg-KA  | 19.0697  | 1.5474  |
| 3  | Al2O3 | 18.8   | mass % | 0.01371 | Al-KA  | 430.2213 | 14.3884 |
| 4  | SiO2  | 60.3   | mass % | 0.02116 | Si-KA  | 1049.837 | 46.1596 |
| 5  | P2O5  | 0.225  | mass % | 0.00289 | P-KA   | 6.3538   | 0.1719  |
| 6  | SO3   | 0.0393 | mass % | 0.00281 | S-KA   | 0.9381   | 0.0301  |
| 7  | K2O   | 4.44   | mass % | 0.00453 | K-KA   | 261.5428 | 3.3949  |
| 8  | CaO   | 4.72   | mass % | 0.00453 | Ca-KA  | 187.7297 | 3.6095  |
| 9  | TiO2  | 1.05   | mass % | 0.01041 | Ti-KA  | 9.7248   | 0.8047  |
| 10 | Cr2O3 | 0.0189 | mass % | 0.00629 | Cr-KA  | 0.4705   | 0.0145  |
| 11 | MnO   | 0.116  | mass % | 0.03705 | Mn-KB1 | 0.9553   | 0.0885  |
| 12 | Fe2O3 | 6.55   | mass % | 0.00568 | Fe-KA  | 384.1946 | 5.0080  |
| 13 | NiO   | 0.0087 | mass % | 0.00271 | Ni-KA  | 0.8891   | 0.0067  |
| 14 | CuO   | 0.0058 | mass % | 0.00235 | Cu-KA  | 0.8144   | 0.0044  |
| 15 | ZnO   | 0.0190 | mass % | 0.00205 | Zn-KA  | 3.4833   | 0.0145  |
| 16 | Ga2O3 | 0.0059 | mass % | 0.00224 | Ga-KA  | 1.1414   | 0.0045  |
| 17 | Rb2O  | 0.0240 | mass % | 0.00123 | Rb-KA  | 15.6865  | 0.0184  |
| 18 | SrO   | 0.0586 | mass % | 0.00126 | Sr-KA  | 40.4863  | 0.0449  |
| 19 | ZrO2  | 0.0815 | mass % | 0.00816 | Zr-KB1 | 13.1684  | 0.0623  |
| 20 | Nb2O5 | 0.0044 | mass % | 0.00154 | Nb-KA  | 3.1847   | 0.0034  |
| 21 | BaO   | 0.1200 | mass % | 0.02765 | Ba-LA  | 0.4917   | 0.0921  |

**Sample: O-N Btk 1 355-850 µm**

|   |       |        |        |         |       |          |         |
|---|-------|--------|--------|---------|-------|----------|---------|
| 1 | Na2O  | 1.45   | mass % | 0.01105 | Na-KA | 5.8756   | 1.1358  |
| 2 | MgO   | 0.768  | mass % | 0.00948 | Mg-KA | 7.6427   | 0.5998  |
| 3 | Al2O3 | 18.1   | mass % | 0.01291 | Al-KA | 443.6889 | 14.1657 |
| 4 | SiO2  | 65.4   | mass % | 0.02148 | Si-KA | #####    | 51.1293 |
| 5 | P2O5  | 0.107  | mass % | 0.00265 | P-KA  | 3.0504   | 0.0833  |
| 6 | SO3   | 0.0197 | mass % | 0.00272 | S-KA  | 0.4745   | 0.0154  |
| 7 | K2O   | 6.95   | mass % | 0.00559 | K-KA  | 409.3061 | 5.4312  |
| 8 | CaO   | 2.34   | mass % | 0.00408 | Ca-KA | 89.2000  | 1.8292  |

|    |       |        |        |         |        |          |        |
|----|-------|--------|--------|---------|--------|----------|--------|
| 9  | TiO2  | 0.464  | mass % | 0.01012 | Ti-KA  | 4.3318   | 0.3627 |
| 10 | MnO   | 0.166  | mass % | 0.00461 | Mn-KA  | 7.2486   | 0.1298 |
| 11 | Fe2O3 | 3.96   | mass % | 0.00500 | Fe-KA  | 242.7436 | 3.0916 |
| 12 | NiO   | 0.0054 | mass % | 0.00217 | Ni-KA  | 0.7236   | 0.0042 |
| 13 | ZnO   | 0.0083 | mass % | 0.00191 | Zn-KA  | 1.7119   | 0.0065 |
| 14 | As2O3 | 0.0035 | mass % | 0.00173 | As-KA  | 1.1157   | 0.0027 |
| 15 | Rb2O  | 0.0381 | mass % | 0.0011  | Rb-KA  | 28.1955  | 0.0298 |
| 16 | SrO   | 0.0186 | mass % | 0.00112 | Sr-KA  | 14.6297  | 0.0145 |
| 17 | ZrO2  | 0.0244 | mass % | 0.00729 | Zr-KB1 | 4.5209   | 0.0191 |
| 18 | BaO   | 0.113  | mass % | 0.02338 | Ba-LA  | 0.466    | 0.0884 |
| 19 | ThO2  | 0.0041 | mass % | 0.00201 | Th-LA  | 1.6671   | 0.0032 |

**Sample: O-N Btk 2 25-125 µm**

|    |       |        |        |         |        |          |         |
|----|-------|--------|--------|---------|--------|----------|---------|
| 1  | Na2O  | 1.44   | mass % | 0.01261 | Na-KA  | 5.4666   | 1.0909  |
| 2  | MgO   | 2.23   | mass % | 0.01051 | Mg-KA  | 20.9283  | 1.6973  |
| 3  | Al2O3 | 18.5   | mass % | 0.0136  | Al-KA  | 419.5797 | 14.0614 |
| 4  | SiO2  | 60.4   | mass % | 0.02133 | Si-KA  | #####    | 45.8627 |
| 5  | P2O5  | 0.216  | mass % | 0.00282 | P-KA   | 6.0650   | 0.1639  |
| 6  | SO3   | 0.0359 | mass % | 0.00289 | S-KA   | 0.8501   | 0.0273  |
| 7  | Cl    | 0.0101 | mass % | 0.00366 | Cl-KA  | 0.1527   | 0.0077  |
| 8  | K2O   | 4.43   | mass % | 0.00341 | K-KA   | 259.2984 | 3.3641  |
| 9  | CaO   | 4.88   | mass % | 0.00435 | Ca-KA  | 192.7650 | 3.7063  |
| 10 | TiO2  | 0.973  | mass % | 0.01004 | Ti-KA  | 8.9076   | 0.7391  |
| 11 | V2O5  | 0.0292 | mass % | 0.01009 | V-KA   | 0.5143   | 0.0222  |
| 12 | MnO   | 0.115  | mass % | 0.00504 | Mn-KA  | 4.7905   | 0.0871  |
| 13 | Fe2O3 | 6.50   | mass % | 0.00571 | Fe-KA  | 378.7574 | 4.9363  |
| 14 | ZnO   | 0.0162 | mass % | 0.00213 | Zn-KA  | 2.9470   | 0.0123  |
| 15 | As2O3 | 0.0037 | mass % | 0.00193 | As-KA  | 1.0567   | 0.0028  |
| 16 | Rb2O  | 0.0231 | mass % | 0.00122 | Rb-KA  | 14.9898  | 0.0176  |
| 17 | SrO   | 0.0647 | mass % | 0.00125 | Sr-KA  | 44.5016  | 0.0492  |
| 18 | Y2O3  | 0.0135 | mass % | 0.00700 | Y-KB1  | 2.1631   | 0.0102  |
| 19 | ZrO2  | 0.0661 | mass % | 0.00819 | Zr-KB1 | 10.6269  | 0.0502  |
| 20 | Bao   | 0.0983 | mass % | 0.02912 | Ba-LA  | 0.3978   | 0.0747  |

**Sample: O-N Btk 2 355-2000 µm**

|   |       |        |        |         |       |          |         |
|---|-------|--------|--------|---------|-------|----------|---------|
| 1 | Na2O  | 1.57   | mass % | 0.01105 | Na-KA | 6.1612   | 1.1823  |
| 2 | MgO   | 0.611  | mass % | 0.00919 | Mg-KA | 5.8887   | 0.4591  |
| 3 | Al2O3 | 17.1   | mass % | 0.01285 | Al-KA | 405.4761 | 12.8318 |
| 4 | SiO2  | 66.7   | mass % | 0.02179 | Si-KA | 1202.001 | 50.1493 |
| 5 | P2O5  | 0.0876 | mass % | 0.00304 | P-KA  | 2.4224   | 0.0661  |
| 6 | SO3   | 0.0277 | mass % | 0.00291 | S-KA  | 0.6419   | 0.0208  |
| 7 | K2O   | 7.34   | mass % | 0.00579 | K-KA  | 414.6605 | 5.5154  |

|    |                                |        |        |         |        |          |        |
|----|--------------------------------|--------|--------|---------|--------|----------|--------|
| 8  | CaO                            | 2.76   | mass % | 0.00459 | Ca-KA  | 99.9385  | 2.0737 |
| 9  | TiO <sub>2</sub>               | 0.317  | mass % | 0.01105 | Ti-KA  | 2.7904   | 0.2380 |
| 10 | MnO                            | 0.133  | mass % | 0.00474 | Mn-KA  | 5.5227   | 0.0999 |
| 11 | Fe <sub>2</sub> O <sub>3</sub> | 3.15   | mass % | 0.00501 | Fe-KA  | 184.2615 | 2.3654 |
| 12 | NiO                            | 0.0047 | mass % | 0.00194 | Ni-KA  | 0.7068   | 0.0035 |
| 13 | ZnO                            | 0.0058 | mass % | 0.00192 | Zn-KA  | 1.1735   | 0.0044 |
| 14 | Ga <sub>2</sub> O <sub>3</sub> | 0.0046 | mass % | 0.00209 | Ga-KA  | 0.9851   | 0.0035 |
| 15 | As <sub>2</sub> O <sub>3</sub> | 0.0039 | mass % | 0.00179 | As-KA  | 1.2227   | 0.0029 |
| 16 | Rb <sub>2</sub> O              | 0.0385 | mass % | 0.00116 | Rb-KA  | 27.9784  | 0.0289 |
| 17 | SrO                            | 0.0206 | mass % | 0.00117 | Sr-KA  | 15.9156  | 0.0155 |
| 18 | ZrO <sub>2</sub>               | 0.0213 | mass % | 0.00756 | Zr-KB1 | 3.8912   | 0.0160 |
| 19 | BaO                            | 0.108  | mass % | 0.02862 | Ba-LA  | 0.4217   | 0.0815 |

### ***References cited:***

- Aitken, M.J., 1985. Thermoluminescence Dating. Academic Press, Florida.
- Aitken, M. J., 1976, Thermoluminescent age evaluation and assessment of error limits: revised system: *Archaeometry*, v. 18, p. 233-238.
- , 1985, Thermoluminescence Dating, Florida, Academic Press.
- , 1998, An Introduction to Optical Dating: The dating of Quaternary sediments by the use of photon-stimulated luminescence, New York, Oxford University Press, 267 p.:
- Aitken, M. J., and Alldred, J. C., 1972, The assessment of error limits in thermoluminescence dating: *Archaeometry*, v. 14, p. 257-267.
- Al-Hashemi, H. M. B., Al-Amoudi, O. S. B., Yamani, Z. H., Mustafa, Y. M., and Ahmed, H.-U.-R., 2021, The validity of laser diffraction system to reproduce hydrometer results for grain size analysis in geotechnical applications: *PloS one*, v. 16, no. 1, p. e0245452-e0245452.
- Birkeland, P. W., 1999, Soils and Geomorphology, New York, Oxford University Press, 430 p.:
- Brennan, B. J., 2003, Beta doses to spherical grains.: *Radiation Measurements*, v. 37, no. 4-5, p. 299-303.
- Colomina, I., and Molina, P., 2014, Unmanned aerial systems for photogrammetry and remote sensing: A review: *Isprs Journal of Photogrammetry and Remote Sensing*, v. 92, p. 79-97.
- Durcan, J. A., and Dulller, G. A., 2011, The fast ratio: a rapid measure for testing the dominance of the fast component in the initial OSL signal from quartz.: *Radiation Measurements*, v. 46, no. 10, p. 1065-1072.
- Faé, G. S., Montes, F., Bazilevskaya, E., Añó, R. M., and Kemanian, A. R., 2019, Making Soil Particle Size Analysis by Laser Diffraction Compatible with Standard Soil Texture Determination Methods: *Soil Science Society of America Journal*, v. 83, no. 4, p. 1244-1252.
- Galbraith, R. F., and Roberts, R. G., 2012, Statistical aspects of equivalent dose and error calculation and display in OSL dating: An overview and some recommendations: *Quaternary Geochronology*, v. 11, p. 1-27.

- Guérin, G., Mercier, N., and Adamiec, G., 2011, Dose-rate conversion factors:update: Ancient TL, v. 29, p. 5-8.
- Huntley, D. J., Godfrey-Smith, D. I., and Thewalt, M. L., 1985, Optical dating of sediments: Nature, v. 313, no. 5998, p. 105-107.
- Kenworthy, M. K., Rittenour, T. M., Pierce, J. L., Sutfin, N. A., and Sharp, W. D., 2014, Luminescence dating without sand lenses: An application of OSL to coarse-grained alluvial fan deposits of the Lost River Range, Idaho, USA: Quaternary Geochronology, v. 23, p. 9-25.
- McAuliffe, J. R., 2016, Perennial Grass-dominated Plant Communities of the Eastern Mojave Desert Region: Desert Plants, v. 32, no. 1, p. 89.
- Miller, D. M., and Wooden, J. L., 1993, Geologic map of the New York Mountains area, California and Nevada.
- Murray, A. S., and Olley, J. M., 2002, Precision and accuracy in the optically stimulated luminescence dating of sedimentary quartz: a status review: Geochronometria, v. 21, p. 1-16.
- Murray, A. S., and Wintle, A. G., 2000, Luminescence dating of quartz using an improved single-aliquot regenerative-dose protocol: Radiation Measurements, v. 32, no. 1, p. 57-73.
- Nelson, M. S., Gray, H. J., Johnson, J. A., Rittenour, T. M., Feathers, J. K., and Mahan, S., 2015, User guide for luminescence sampling in archaeological and geological context: Advances in Archaeological Practice, v. 3, p. 166-177.
- Prescott, J. R., and Hutton, J. T., 1994, Cosmic-Ray Contributions to Dose-Rates for Luminescence and ESR Dating - Large Depths and Long-Term Time Variations: Radiation Measurements, v. 23, no. 2-3, p. 497-500.
- Rittenour, T. M., Goble, R. J., and Blum, M. D., 2005, Development of an OSL chronology for late Pleistocene channel belts in the lower Mississippi valley: Quaternary Science Reviews, v. 24, p. 2539-2554.
- Wintle, A. G., and Murray, A. S., 2006, A review of quartz optically stimulated luminescence characteristics and their relevance in single-aliquot regeneration dating protocols: Radiation Measurements, v. 41, no. 4, p. 369-391.
